# Supplementary material
Source: PubMed Central journal article supplement (PMC7839364)
Supplement: advancesADV2020003081-suppl2.pdf [file advancesADV2020003081-suppl2.pdf]

Supplemental Figures and Tables

Supplemental Figure 1: Kaplan Meier curve representing A) PFS and B) OS of the 71 patients with a confirmed AITL.

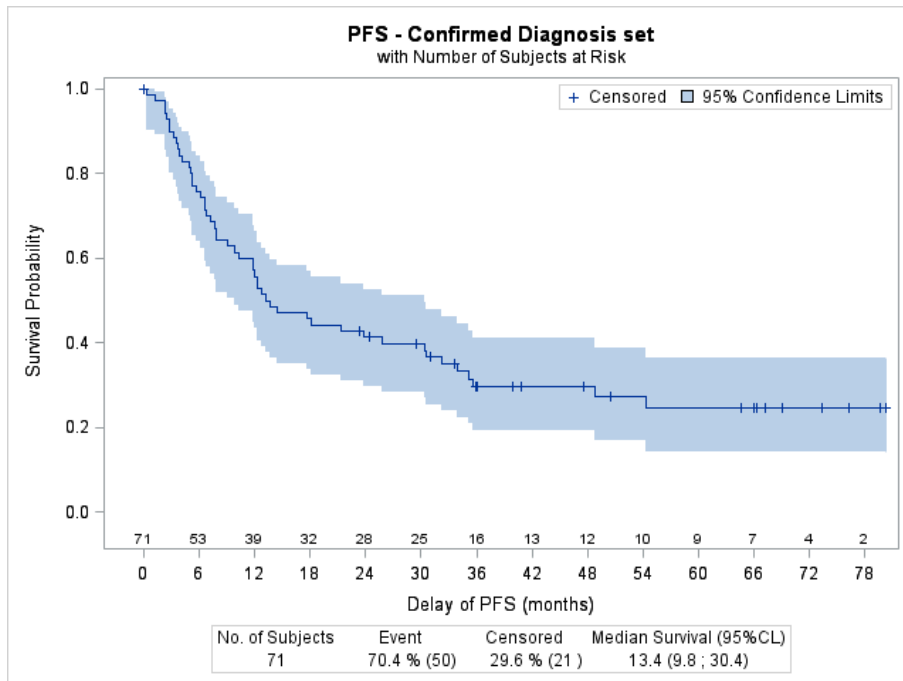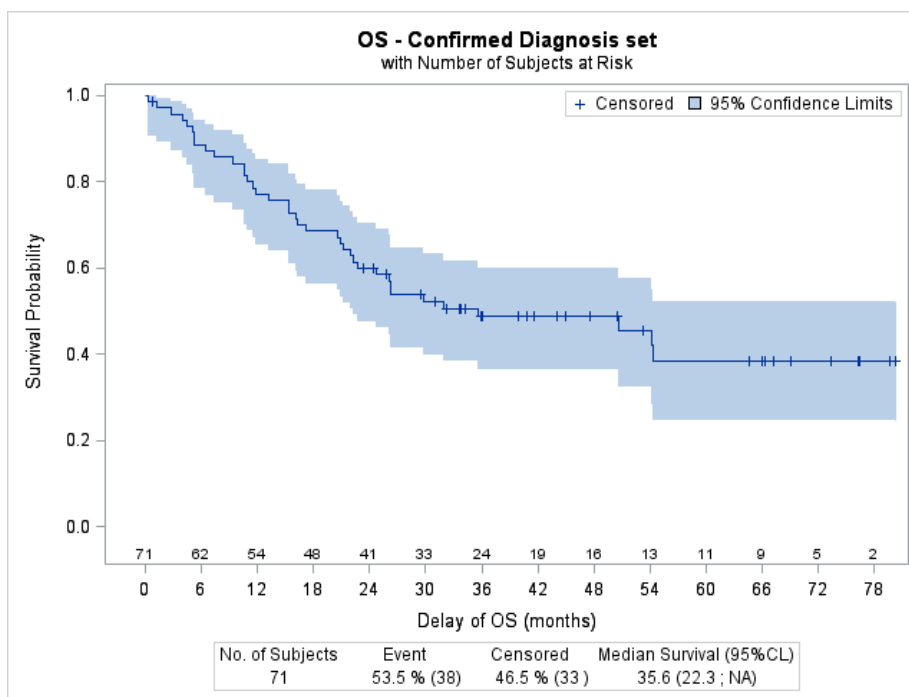

**Supplemental figure 2: Coexistence of Bone marrow involvement assessed by bone marrow trephine (BMI+) and blood involvement assessed by flow cytometry (FCM) or PCR-DGGE.** 8 patients (gray) was BMI, FCM and PCR negative. 8 patients (blue) had a BMI (demonstrated in bone marrow biopsy), but no detectable circulating population by PCR or FCM. 7 patients (yellow) had a clonal circulating population assessed by PCR, but no circulating population detectable by FCM or BMI. One patient (red) had a detectable circulating population detectable by FCM, but not by PCR or BMI. 5 patients (green) were BMI+ and PCR+, with a negative FCM. 2 patients (purple) were BMI+ and FCM+ but had no detectable clonal circulating population in PCR. Four patients (orange) were FCM+ and PCR+, with no evidence of BMI on bone marrow biopsy. Seven patients had BMI and positive FCM and PCR.

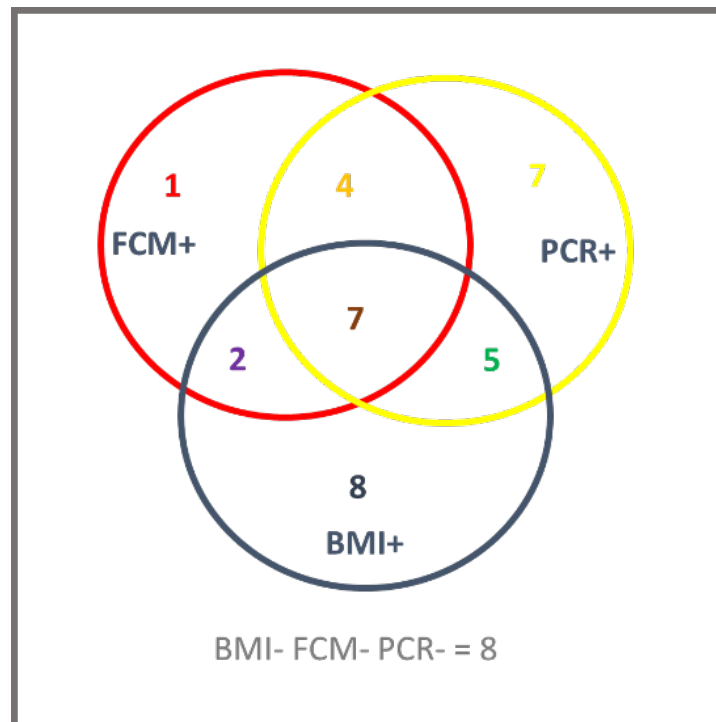

Supplemental Figure 3: Correlation between the number of copies of EBV genome in blood and expression of EBV RNA (EBER) in tumour, and between SUVmax and % of neoplastic T cells, estimated by morphology and immunochemistry (< or > 50%) and presence of EBV positive B blast within the tumour microenvironment. EBV low means EBV score 0 or 1, and EBV high, EBV score 2 or 3 with score 0: absence of large EBV-positive cells; score 1: up to 5 large EBV positive cells per high power field (hpf), score 2: 5 to 50 per hpf and score 3 : > 50 per hpf , or sheets or aggregates of large EBV-positive cells. Comparison was made using a Mann Whitney test.

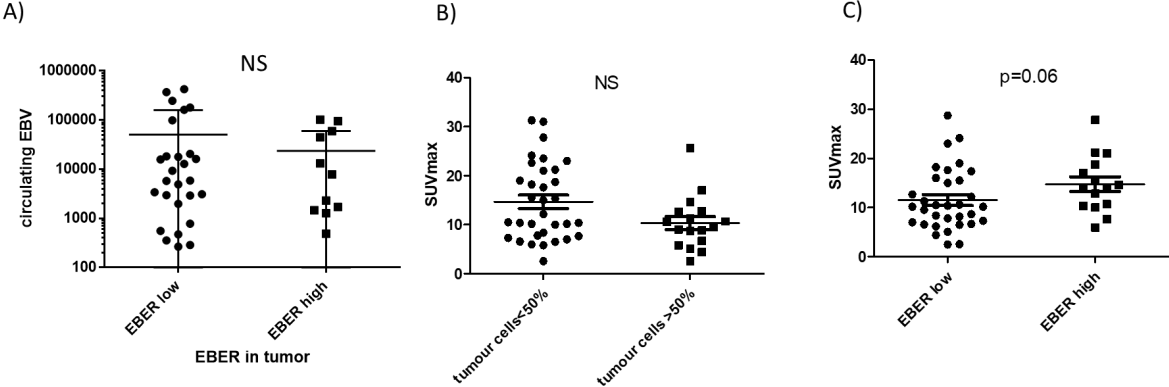

Supplemental figure 4: Comparison of variant allele frequency (VAF). Wilcoxon rank sum test.

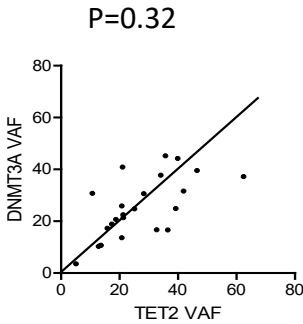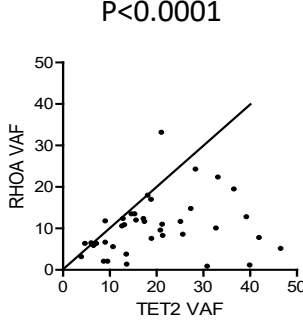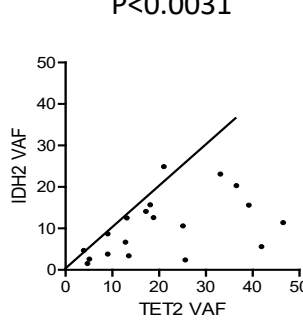

Supplemental Figure 5: Overall survival Kaplan Meier curves depending on the presence of TET2, IDH2, DNMT3A, TET2+IDH2+DNMT3A and RHOA mutation

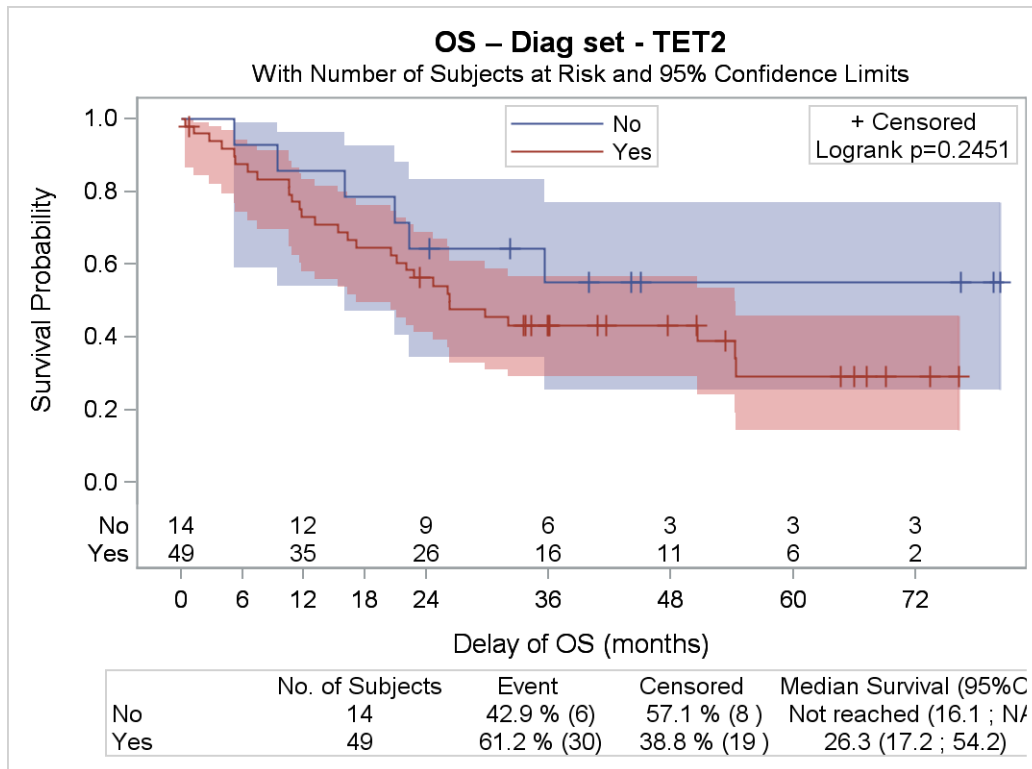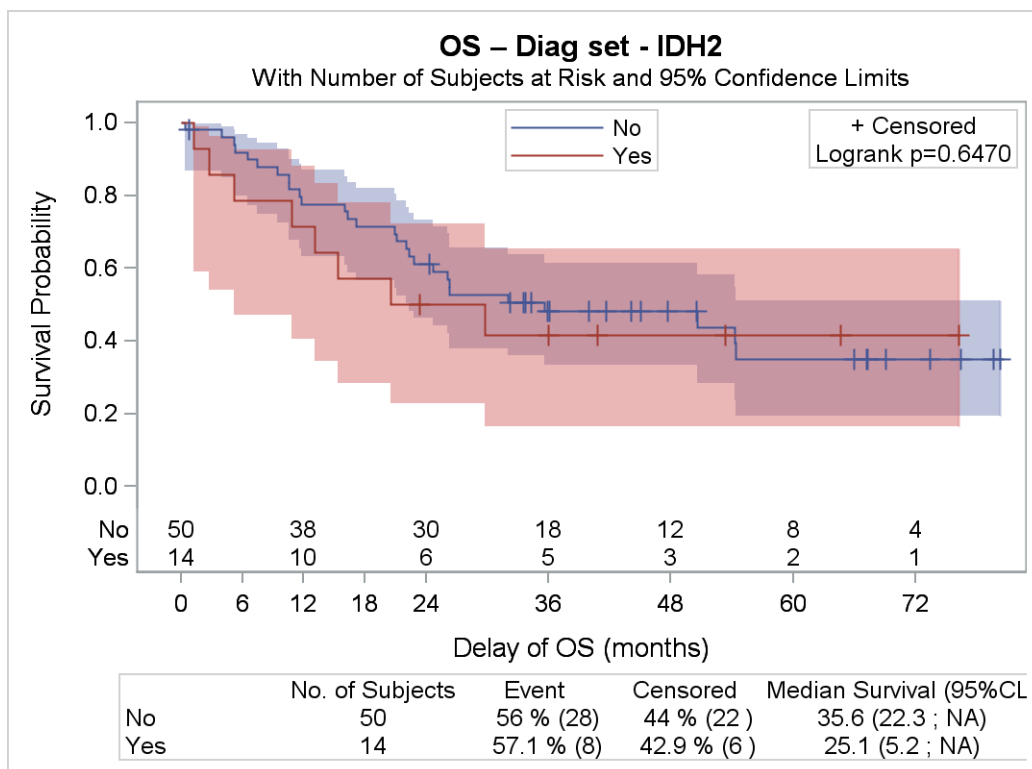

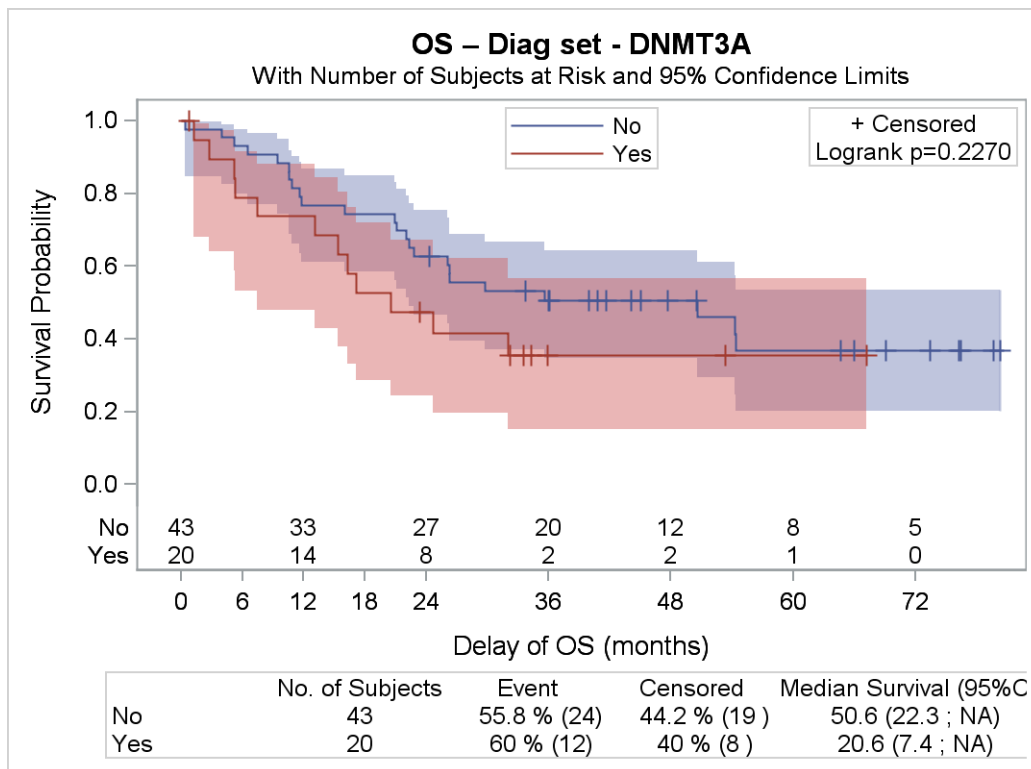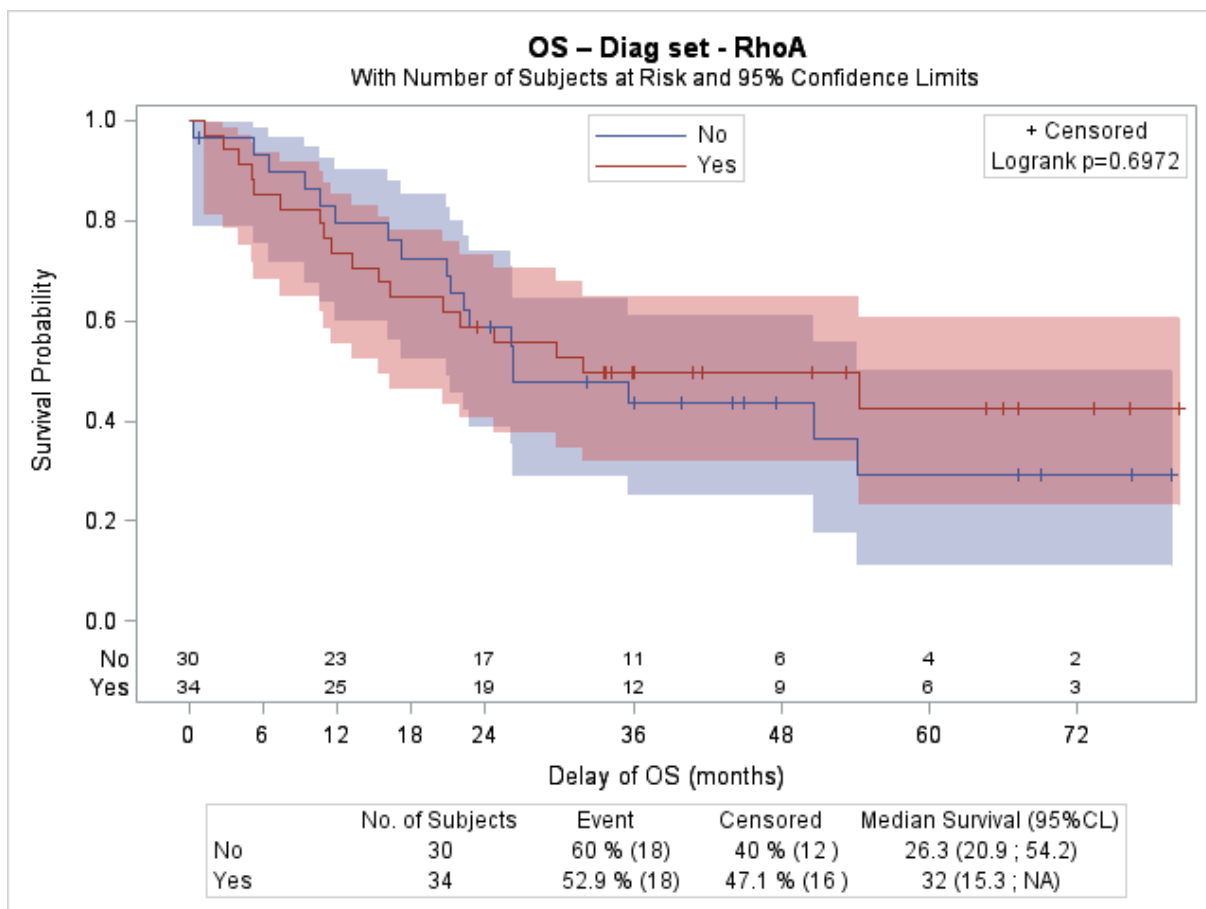

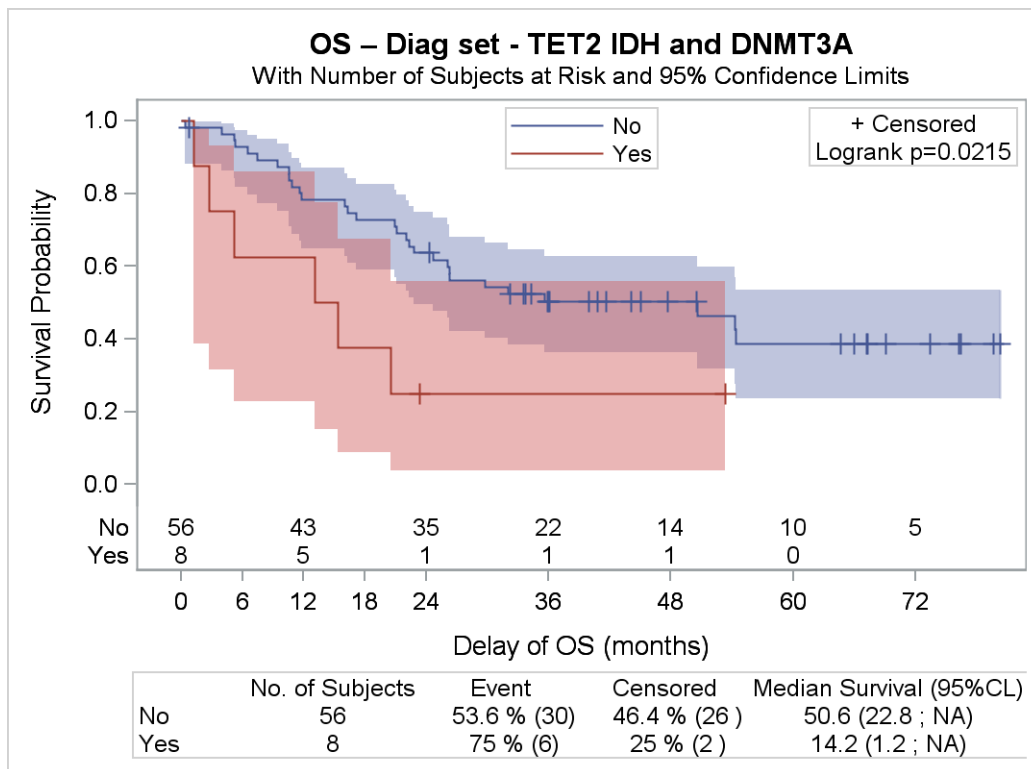

Figure S6: OS and PFS depending on the TMTV, with a threshold at 230cm<sup>3</sup>, or in dichotomizing the cohort at the median

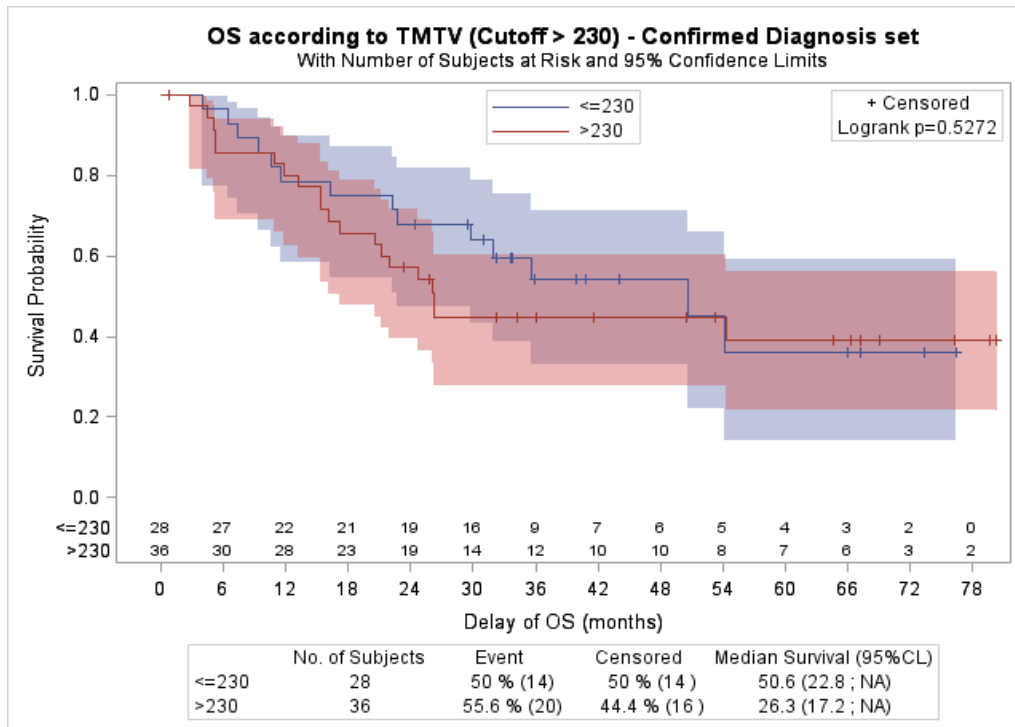

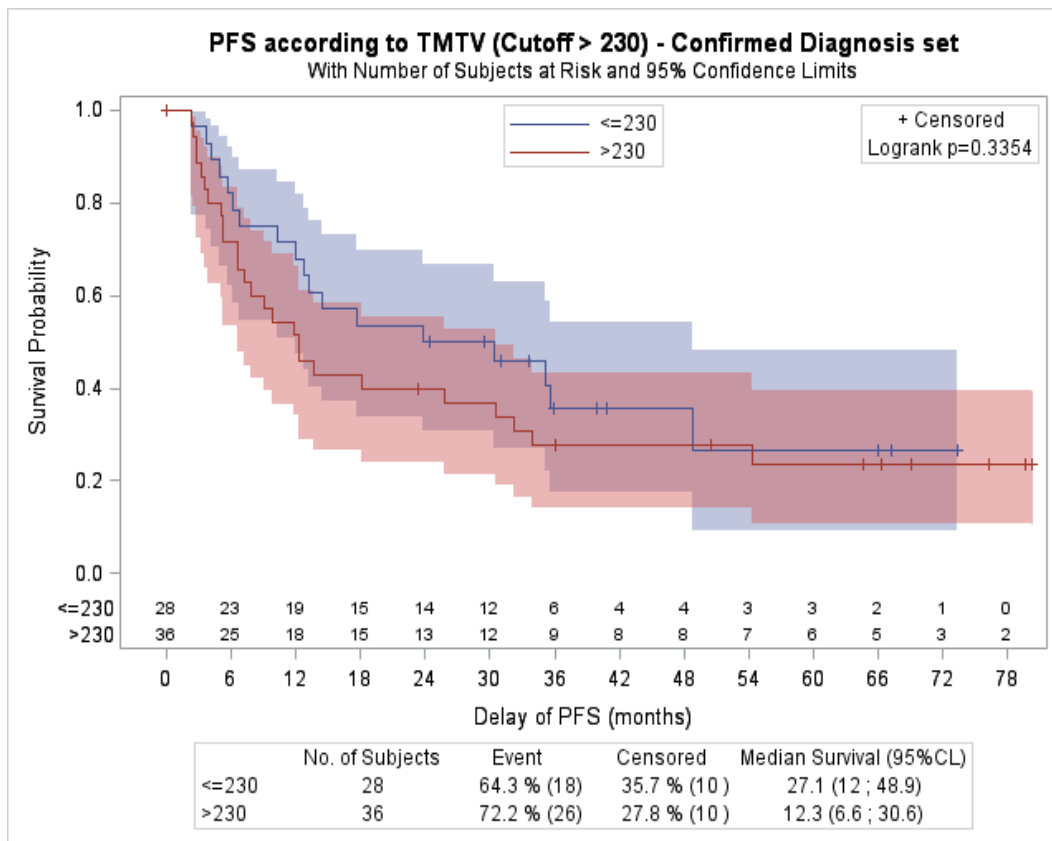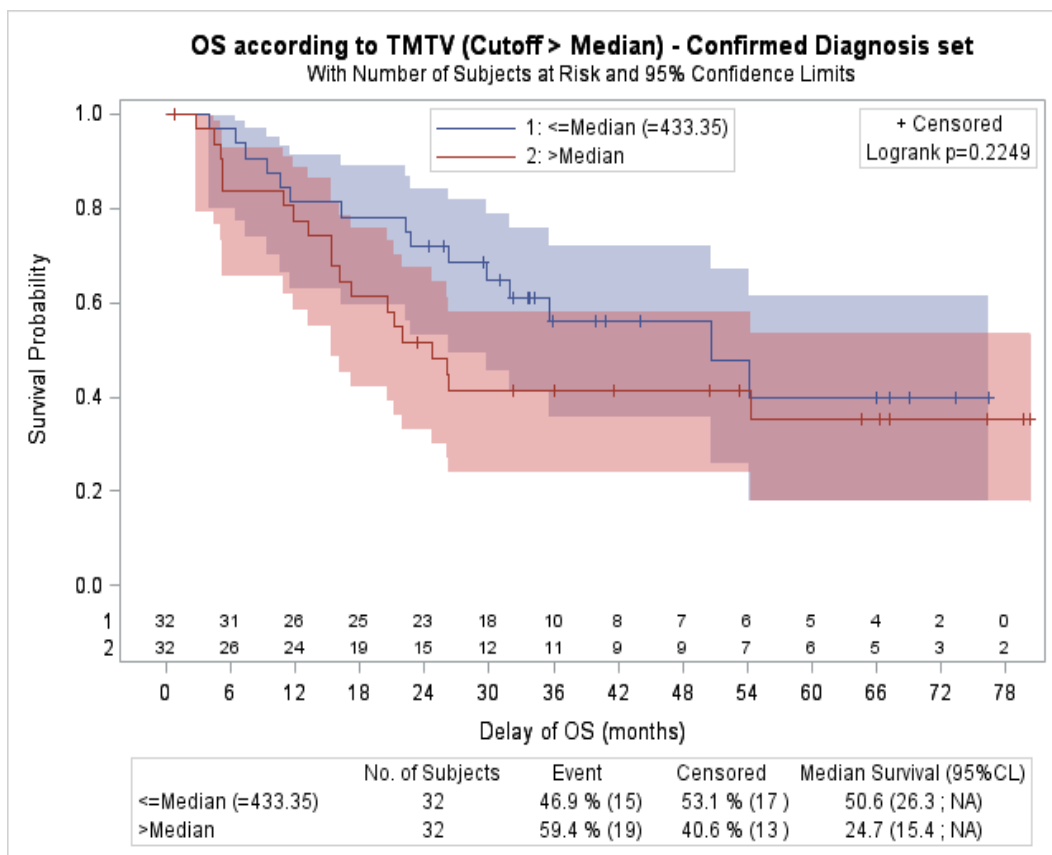



**PFS according to TMTV (Cutoff > Median) - Confirmed Diagnosis set**  
 With Number of Subjects at Risk and 95% Confidence Limits

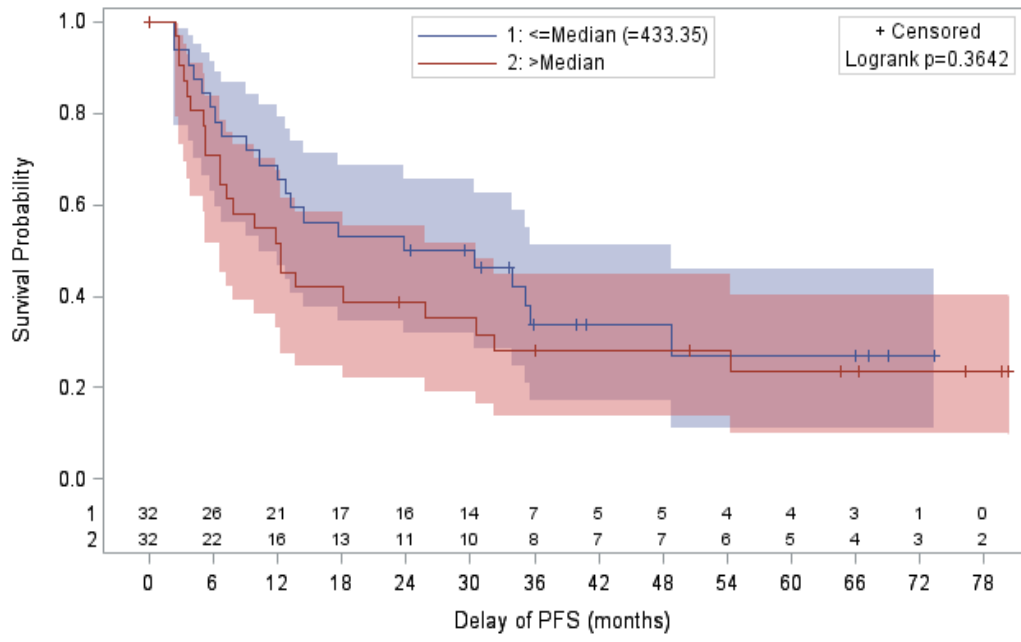

|                    | No. of Subjects | Event       | Censored    | Median Survival (95%CL) |
|--------------------|-----------------|-------------|-------------|-------------------------|
| <=Median (=433.35) | 32              | 65.6 % (21) | 34.4 % (11) | 27.1 (10.3 ; 48.9)      |
| >Median            | 32              | 71.9 % (23) | 28.1 % (9)  | 12.3 (6.6 ; 30.6)       |

Supplemental table 1: Correlation between the detection of the mutations in TET2, RHOA, DNMT3A and IDH2 and clinical and pathological factors. Bold characters represent significant values.

|                               | <b>Odds ratio[95%CI]</b>  |                           |                     |                          |
|-------------------------------|---------------------------|---------------------------|---------------------|--------------------------|
|                               | <i>TET2</i> mut           | <i>RHOA</i> mut           | <i>DNMT3A</i> mut   | <i>IDH2</i> mut          |
| <b>Age&gt;65 years</b>        | <b>6.2</b><br>[1.4 ;30]   | 1.5<br>[0.4 ;6.6]         | 4.3<br>[0.7; 80.6]  | 2.4<br>[0.4; 48]         |
| <b>IPI (3-5)</b>              | <b>6.7</b><br>[1.9 ;25.9] | 2.2<br>[0.7;7.6]          | 4.1<br>[0.99; 28.1] | 1.3<br>[0.3;6.5]         |
| <b>PIT (3-4)</b>              | 3.1<br>[0.7 ; 21.9]       | 3.6<br>[1;14]             | 2.3<br>[0.7; 7.6]   | 3.2<br>[0.9;12.0]        |
| <b>BMI</b>                    | 0.5 [0.1-1.9]             | <b>0.3 [0.1-0.8]</b>      | 0.6 [0.2-1.8]       | <b>0.05 [0.003-0.3]</b>  |
| <b>Strong ICOS expression</b> | <b>4.2</b><br>[1.0; 19.2] | <b>3.7</b><br>[1.1; 14.5] | 1.5<br>[0.4;6.7]    | 1.5<br>[0.4; 8.2]        |
| <b>FDC expansion</b>          | 1.8<br>[0.5; 6.6]         | 7.7<br>[2.3 ;31.3]        | 2.1<br>[0.6;8.7]    | <b>11.32</b><br>[2.19;I] |
| <b>Clear cells</b>            | 5.7<br>[0.9; 111]         | 3.3<br>[0.8;14.3]         | 2.6<br>[0.6;11.1]   | 24<br>[4.5;195]          |

Supplemental Table 2: impact of the mutational landscape on response rate and survival

| Mutated vs unmutated    | CMR<br>Odds ratio [IC95%] | PFS<br>Hazard ratio [IC95%] | OS<br>Hazard ratio [IC95%] |
|-------------------------|---------------------------|-----------------------------|----------------------------|
| <i>TET2</i>             | 0.633 (0.188-2.122)       | 1.3080 (.649-2.639)         | 1.673 (0.696-4.021)        |
| <i>DNMT3A</i>           | 0.349 (0.099-1.079)       | <b>1.924 (1.033-3.583)</b>  | 1.535 (0.762-3.092)        |
| <i>IDH2</i>             | 1.500 (0.449-5.030)       | 0.947 (0.457-1.962)         | 1.201 (0.547-2.638)        |
| <i>RHOA</i>             | 1.535 (0.567-4.258)       | 0.843 (0.472-1.506)         | 0.878 (0.456-1.689)        |
| <i>TET2+IDH2+DNMT3A</i> | 0.800 (0.152-3.588)       | 2.120 (0.935-4.809)         | <b>2.737 (1.119-6.694)</b> |
